# Supplementary material
Source: Elsevier journal article supplement (https://www.sciencedirect.com/science/article/pii/S0210569118301608)

**Supplementary Figure 1** Dynamic compliance during a 24-h study period stratified by study group and survival status. Boxplots show median, 25<sup>th</sup> and 75<sup>th</sup> percentiles. Whiskers show 5<sup>th</sup> and 95<sup>th</sup> percentiles. <sup>a</sup>  $P < 0.05$ . ECMO: extracorporeal membrane oxygenation.

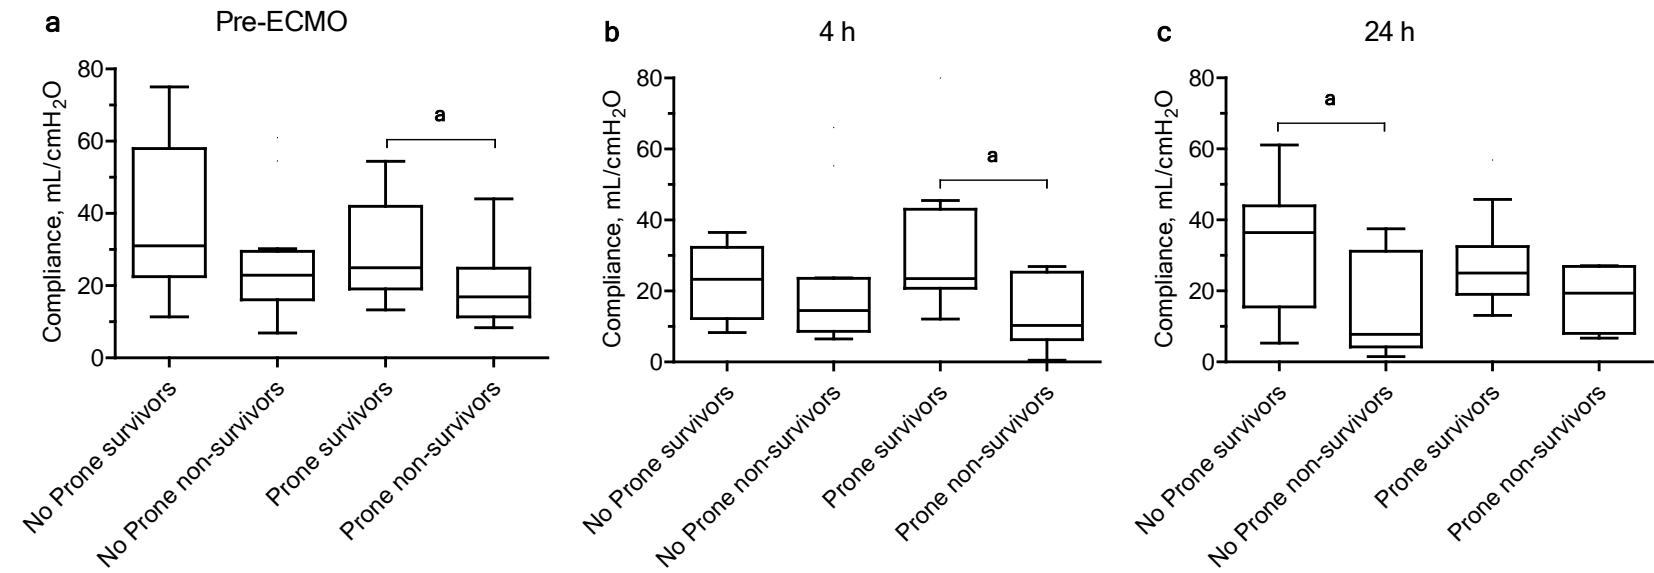

Supplement: mmc1 [file S0210569118301608:mmc1.pdf]
